# Supplementary material for: Cu( i )-catalysed 1,2,3-triazole stitched chalcomer assembly as Pb( ii ) and Cu( ii ) ion sensor: DFT and docking scrutiny
Source: Royal Society of Chemistry journal article supplement (doi:10.1039/d3ra05760g), 2023-01-01
Supplement: d3ra05760g1.pdf [file d3ra05760g1.pdf]

## **Supporting Information**

# **Cu(I)-catalysed 1,2,3-triazole stitched chalcone assembly as Pb(II) and Cu(II) ion sensor: DFT and docking scrutiny**

**Riddima Singh,<sup>a</sup> Gurleen Singh,<sup>a</sup> Nancy George,<sup>a</sup> Gurjaspreet Singh,<sup>b</sup> Anita Devi,<sup>b</sup> Harminder Singh,<sup>a</sup> Gurpreet Kaur,<sup>c,#</sup> Jandeep Singh,<sup>a,\*</sup>**

<sup>a</sup> School of Chemical Engineering and Physical Sciences, Lovely Professional University, Phagwara–144411 (Punjab)

<sup>b</sup> Department of Chemistry and Centre of Advanced Studies in Chemistry, Panjab University, Chandigarh–160014

<sup>c</sup> Department of Chemistry, GGN Khalsa College, Civil lines, Ludhiana–141001 (Punjab)

**\*,# Corresponding Authors**

**Contact details:**

**[\\*singhjandeep@gmail.com](mailto:singhjandeep@gmail.com)**

**Contents:**

**Figure S1:** IR spectrum of chalcone 3

**Figure S2:** IR spectrum of alkyne 4

**Figure S3:**  $^1\text{H}$  NMR spectrum of alkyne 4

**Figure S4:**  $^{13}\text{C}$  NMR spectrum of alkyne 4

**Figure S5:** IR spectrum of benzyl azide 5

**Figure S6:**  $^1\text{H}$  NMR spectrum of benzyl azide 5

**Figure S7:**  $^{13}\text{C}$  NMR spectrum of benzyl azide 5

**Figure S8:** IR spectrum of probe CBT

**Figure S9:**  $^1\text{H}$  NMR spectrum of CBT

**Figure S10:**  $^{13}\text{C}$  NMR spectrum of CBT

**Figure S11:** Mass spectrum of CBT

**Figure S12:** Time dependent spectra of CBT-Pb(II) complex displaying the trend in the absorption.

**Figure S13:** Time dependent spectra of CBT-Cu(II) complex displaying the trend in the absorption.

**Figure S14:** Individual absorption profile of all cations.

**Figure S15:**  $^1\text{H}$ -NMR of probe CBT on interaction with the metal ion.

**Table S1:** Cartesian co-ordinates of CBT

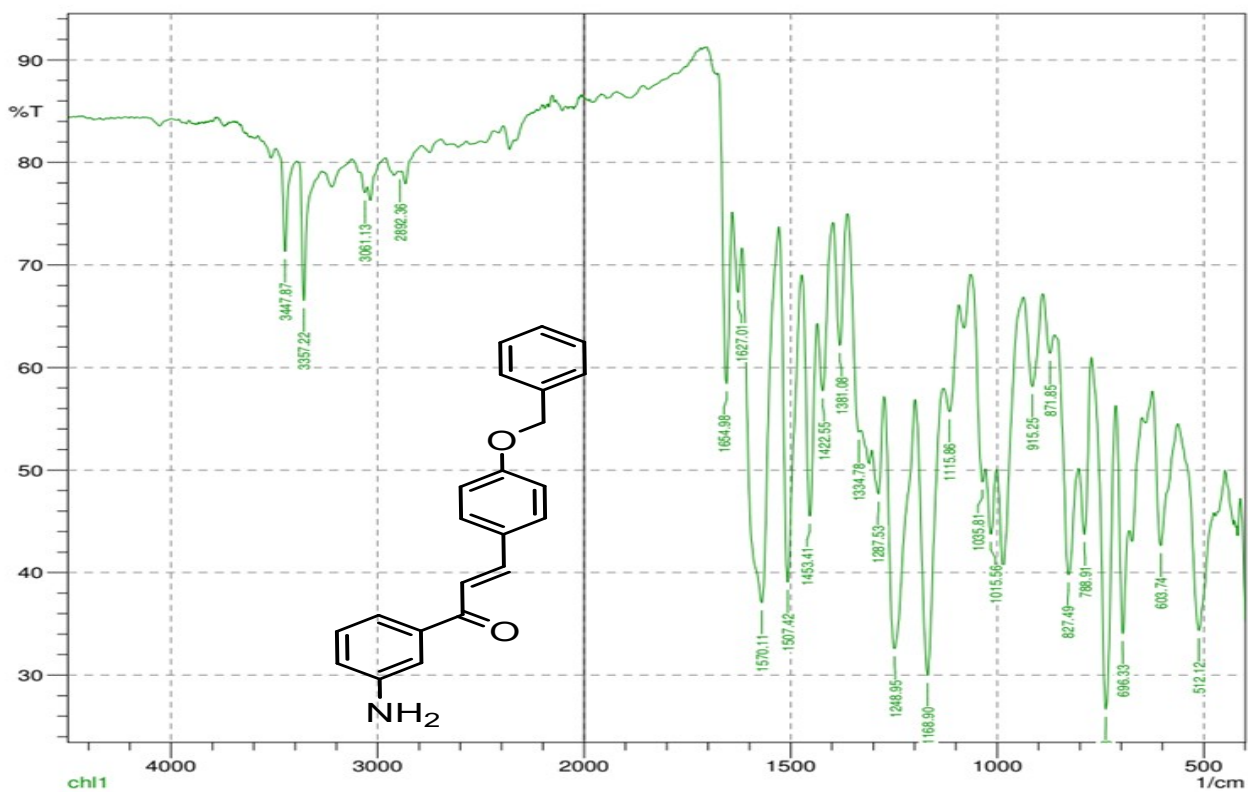

Figure S1: IR spectrum of chalcone 3

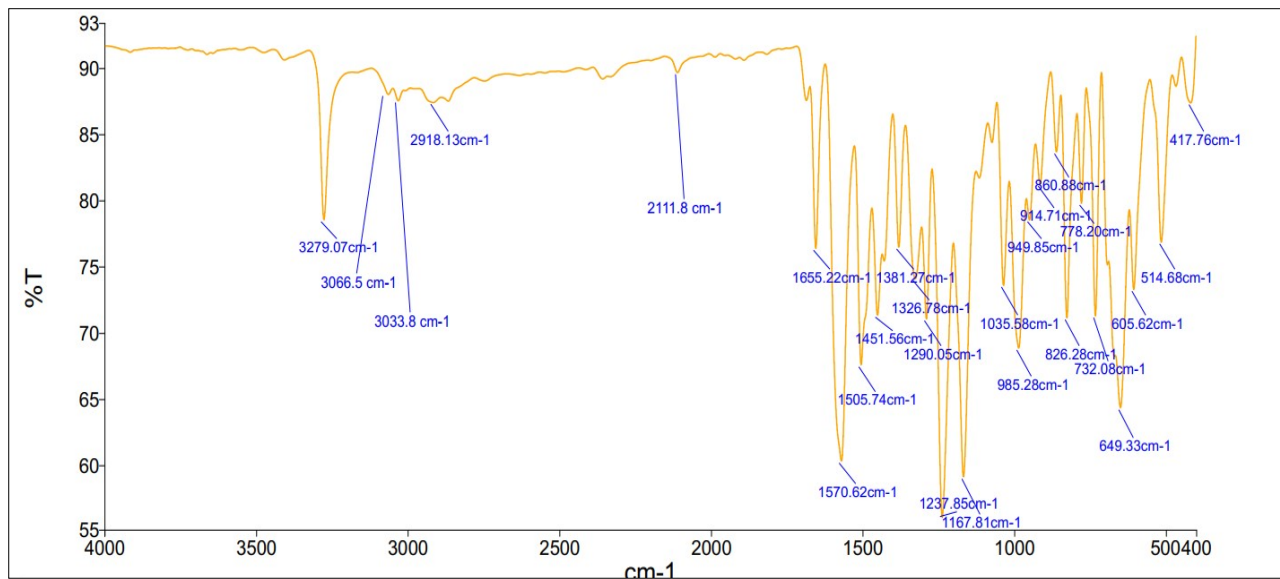

Figure S2: IR spectrum of alkyne 4

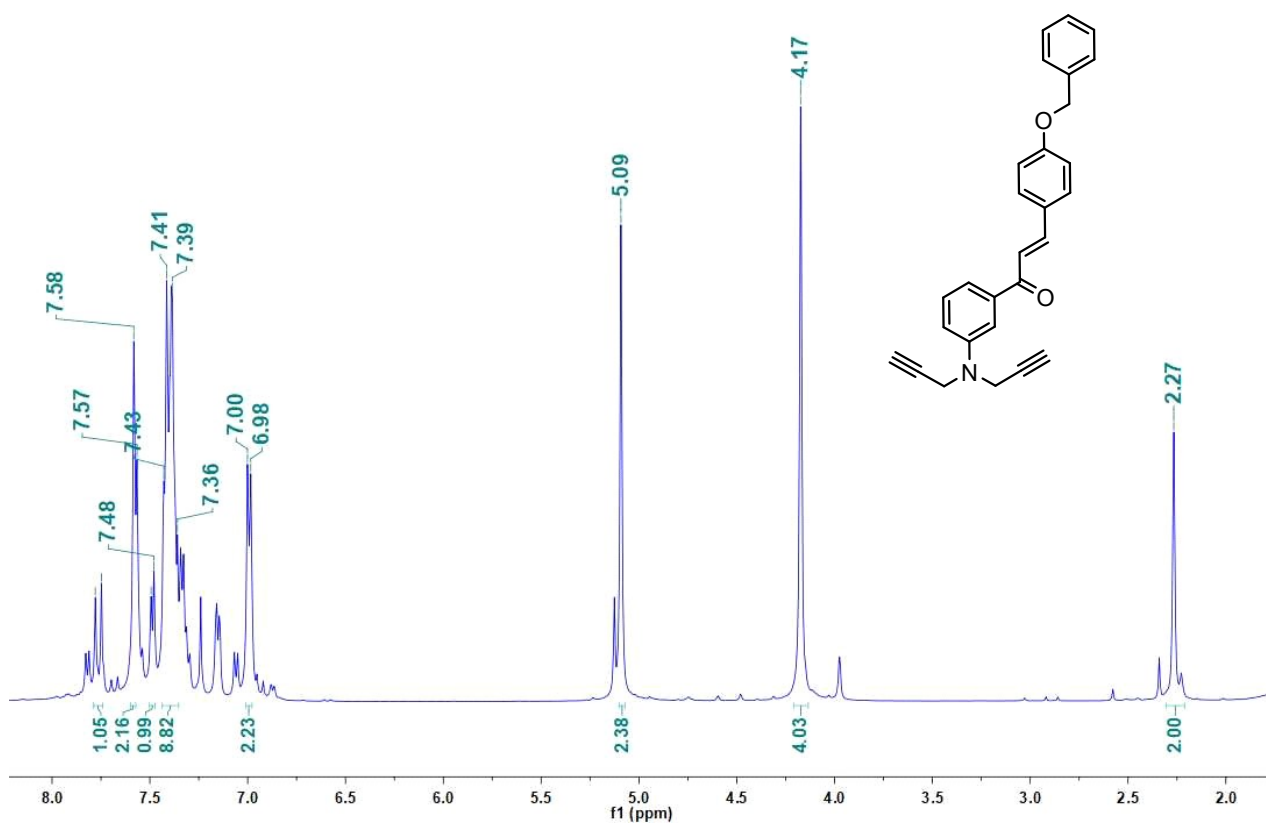

**Figure S3:**  $^1\text{H}$  NMR spectrum of alkyne 4

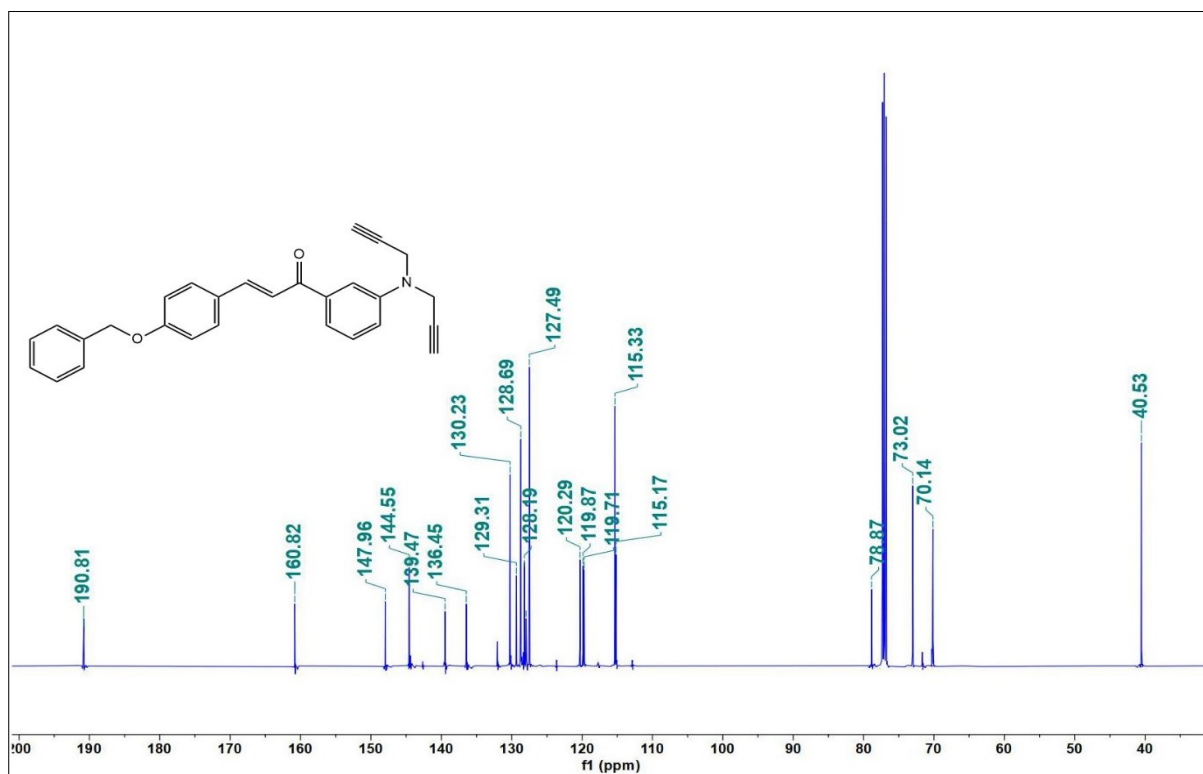

Figure S4:  $^{13}\text{C}$  NMR spectrum of alkyne 4

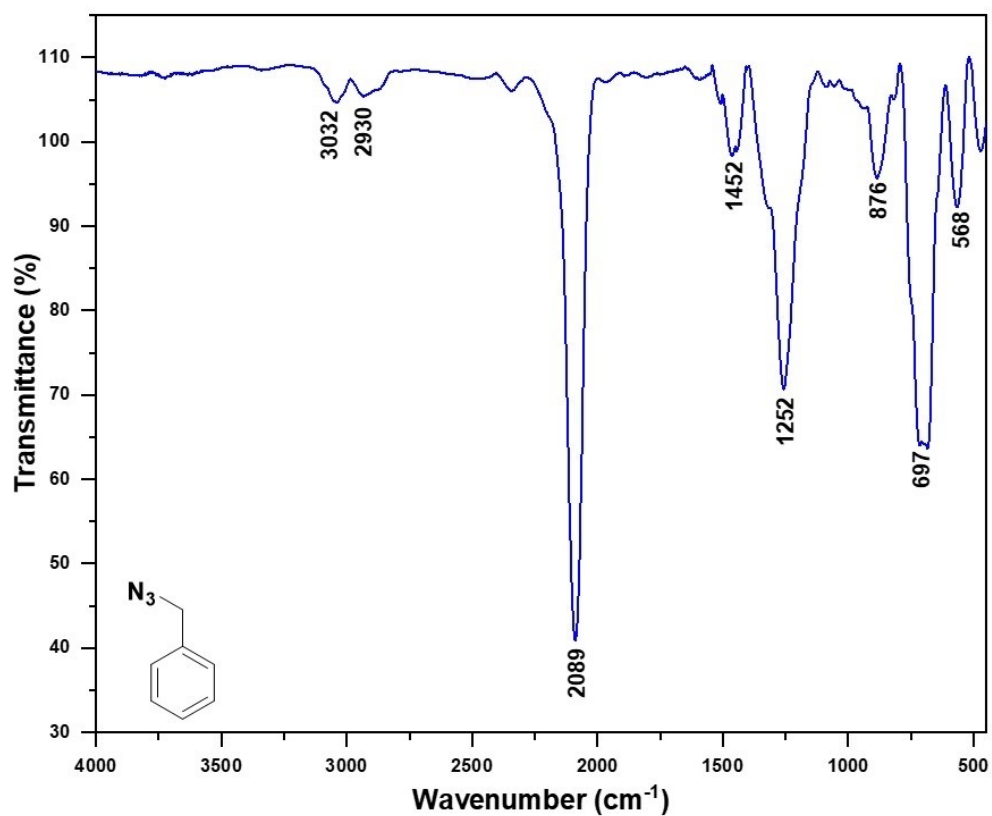

Figure S5: IR spectrum of benzyl azide 5

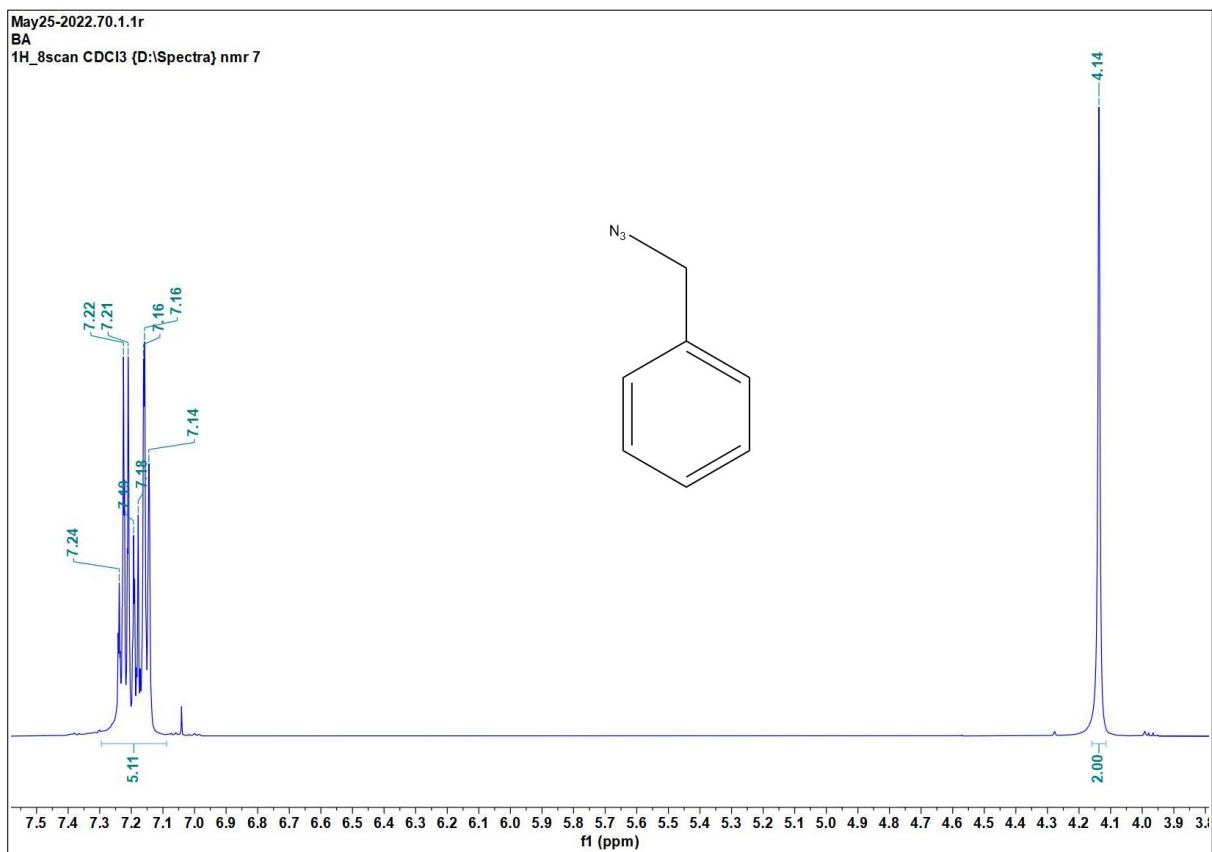

**Figure S6:**  $^1\text{H}$  NMR spectrum of benzyl azide 5

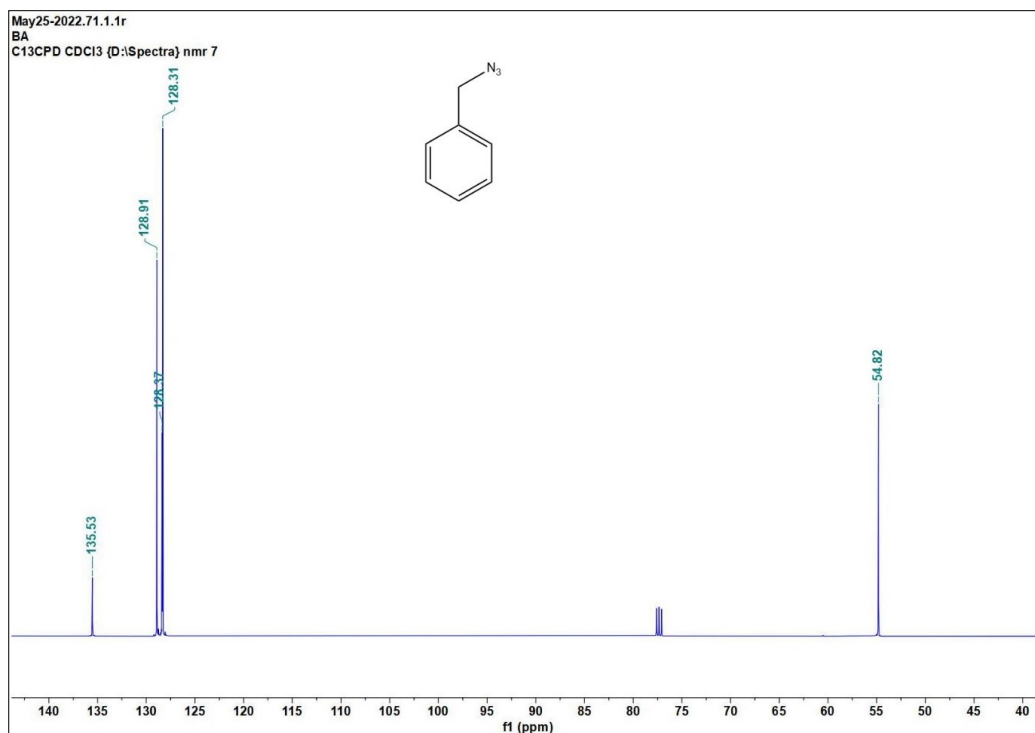

**Figure S7:**  $^{13}\text{C}$  NMR spectrum of benzyl azide 5

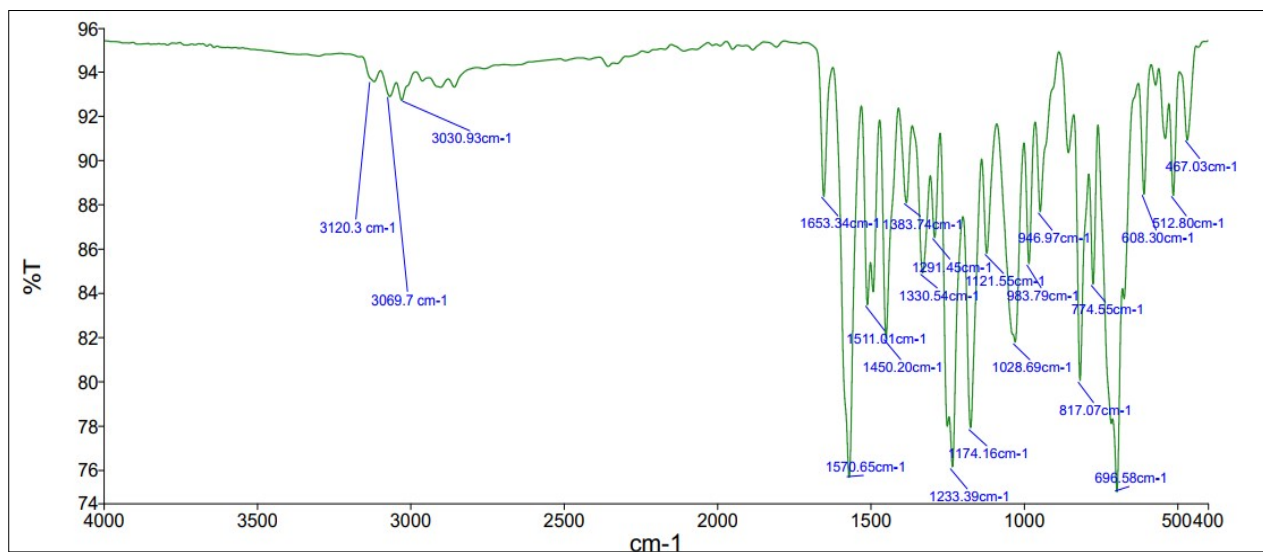

**Figure S8:** IR spectrum of probe CBT

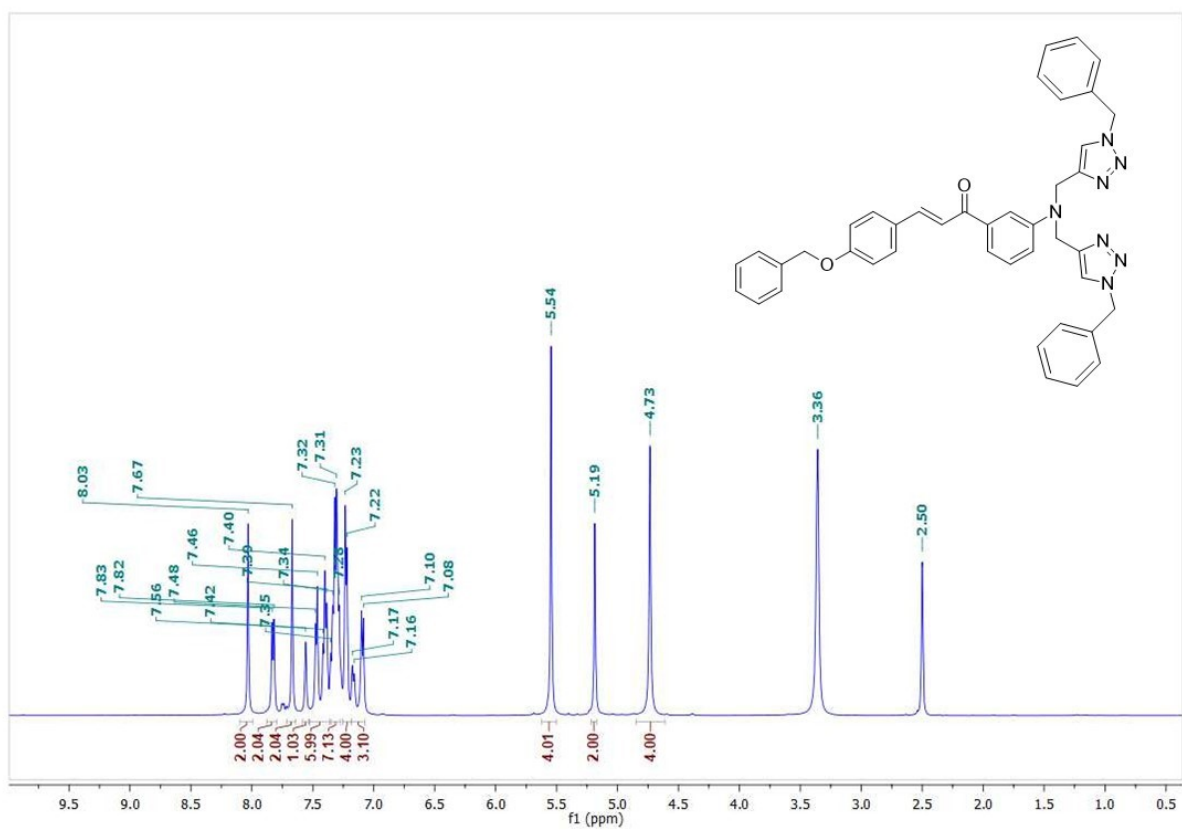

Figure S9: <sup>1</sup>H NMR spectrum of CBT

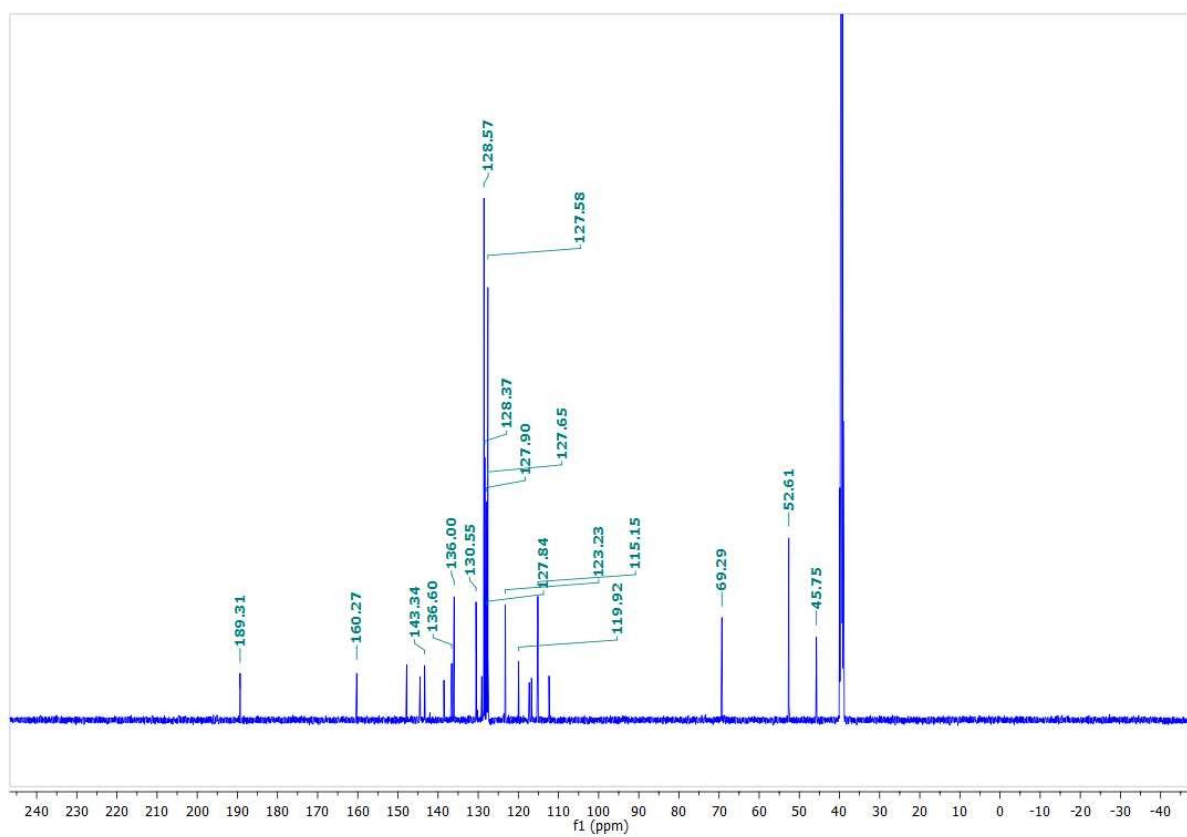

Figure S10: <sup>13</sup>C NMR spectrum of CBT

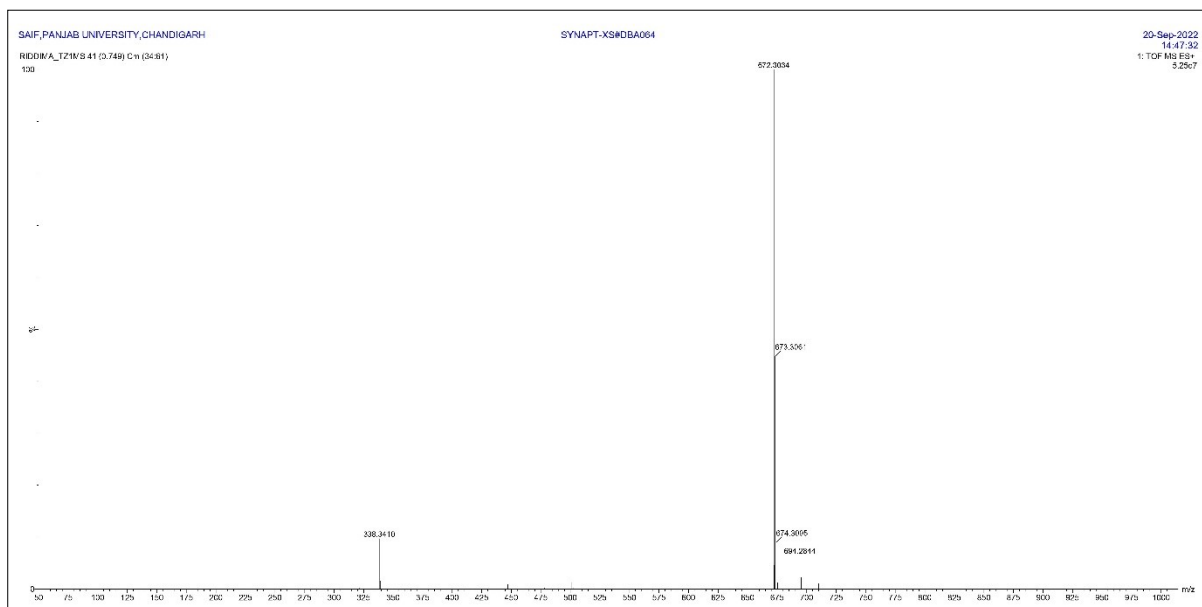

**Figure S11:** Mass spectrum of CBT

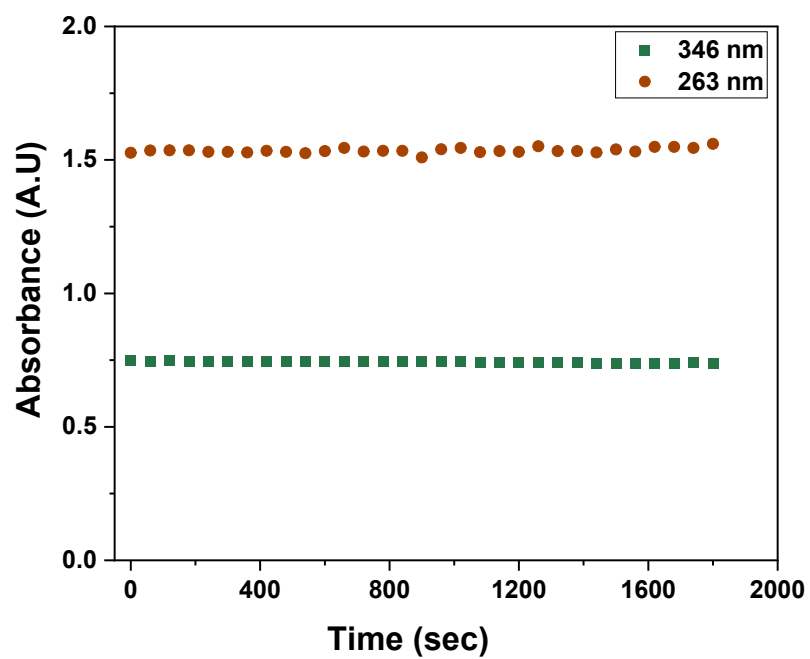

**Figure S12:** Time dependent spectra of CBT-Pb(II) complex displaying the trend in the absorption



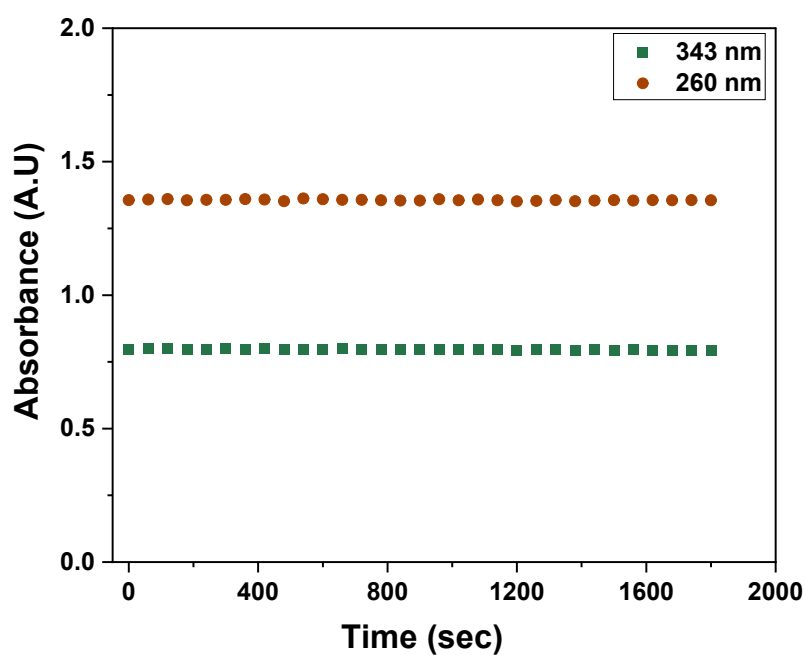

**Figure S13:** Time dependent spectra of CBT-Cu(II) complex displaying the trend in the absorption.

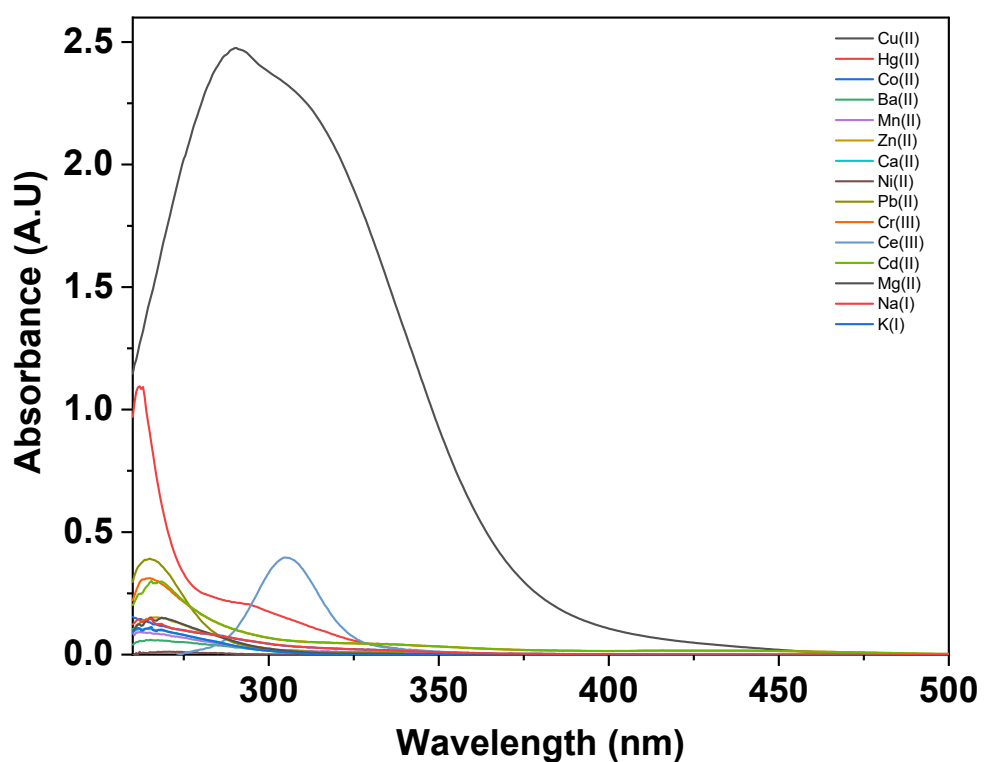

**Figure S14:** Individual absorption profile of all cations.

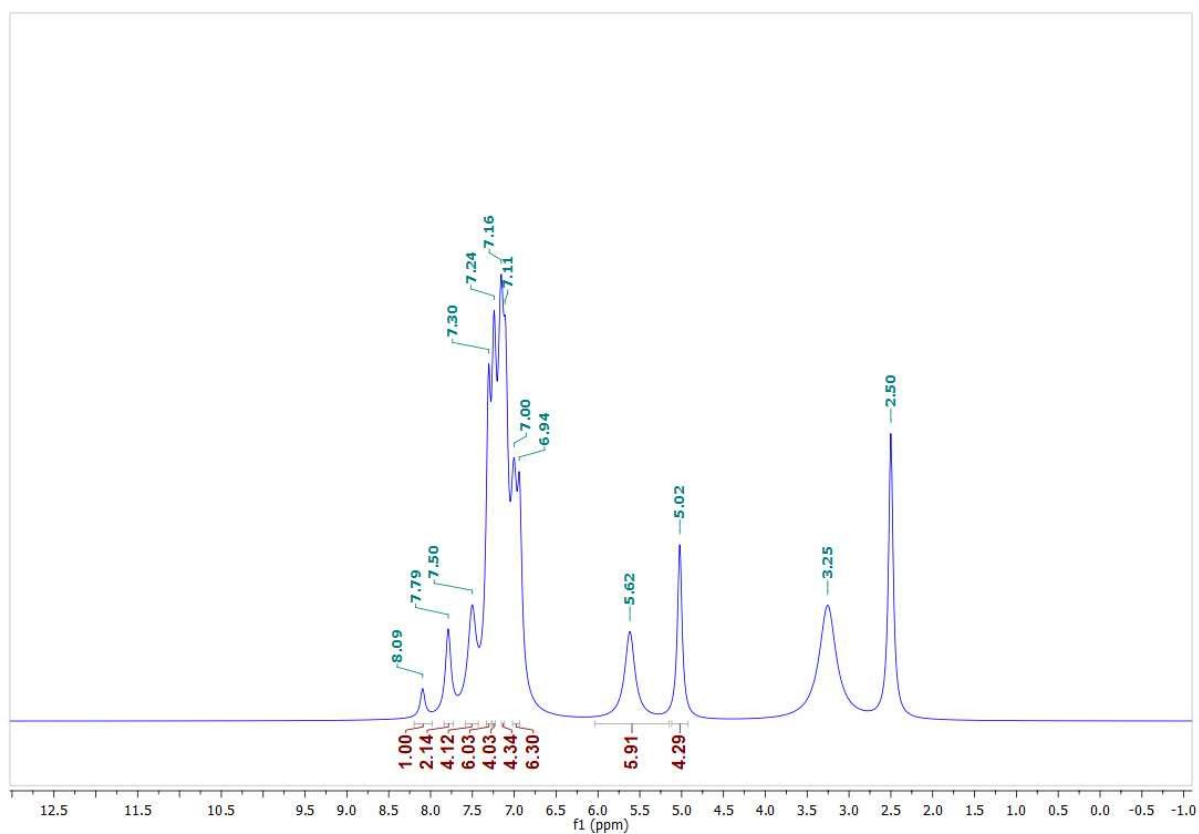

**Figure S15:**  $^1\text{H}$ -NMR of probe CBT on interaction with the metal ion.

**Table S1:** Cartesian co-ordinates of CBT

| Symbol | X         | Y         | Z         |
|--------|-----------|-----------|-----------|
| C      | 12.432462 | -0.421049 | 1.816211  |
| C      | 13.700227 | 0.15429   | 1.924438  |
| C      | 14.526122 | 0.242048  | 0.799945  |
| C      | 14.079336 | -0.246207 | -0.431064 |
| C      | 12.810293 | -0.82025  | -0.535329 |
| C      | 11.975678 | -0.912067 | 0.585965  |
| C      | 8.349002  | -0.764365 | 0.036491  |
| C      | 7.81399   | -2.055988 | 0.128935  |
| C      | 6.441198  | -2.242687 | -0.046094 |
| C      | 5.569985  | -1.173637 | -0.315488 |
| C      | 6.136838  | 0.119306  | -0.401562 |
| C      | 7.495073  | 0.323221  | -0.230323 |
| C      | 4.147834  | -1.44746  | -0.488124 |
| C      | 3.159884  | -0.572705 | -0.781693 |

|   |           |           |           |
|---|-----------|-----------|-----------|
| C | 1.757578  | -1.035272 | -0.900162 |
| C | 0.698447  | -0.049026 | -1.310893 |
| O | 1.448908  | -2.20486  | -0.65557  |
| C | -0.636327 | -0.454517 | -1.165784 |
| C | -1.708419 | 0.382583  | -1.526922 |
| C | -1.390656 | 1.647036  | -2.080903 |
| C | -0.065247 | 2.039778  | -2.241743 |
| C | 0.989555  | 1.211339  | -1.853666 |
| N | -3.045199 | 0.003873  | -1.351071 |
| C | -4.061993 | 0.607187  | -2.215555 |
| C | -4.659441 | 1.881045  | -1.678004 |
| N | -5.131278 | 2.851489  | -2.51417  |
| N | -5.63279  | 3.827864  | -1.802523 |
| N | -5.487267 | 3.493062  | -0.500964 |
| C | -4.879083 | 2.286354  | -0.376843 |
| C | -5.921699 | 4.420387  | 0.544494  |
| C | -4.77804  | 5.17339   | 1.197972  |
| C | -3.974848 | 6.038292  | 0.440044  |
| C | -2.931117 | 6.74056   | 1.043258  |
| C | -2.680392 | 6.590913  | 2.411821  |
| C | -3.477087 | 5.733272  | 3.172298  |
| C | -4.520633 | 5.026801  | 2.565547  |
| O | 9.66686   | -0.453541 | 0.186966  |
| C | -3.335071 | -1.307983 | -0.767599 |
| C | -4.708622 | -1.425796 | -0.174862 |
| N | -5.091907 | -0.727618 | 0.937481  |
| N | -6.309881 | -1.064316 | 1.262313  |
| N | -6.731543 | -1.98702  | 0.369021  |
| C | -5.759889 | -2.241833 | -0.543638 |
| C | -8.067387 | -2.573143 | 0.4953    |
| C | -8.041944 | -4.061852 | 0.783416  |
| C | -8.708604 | -4.956985 | -0.060647 |

|   |           |           |           |
|---|-----------|-----------|-----------|
| C | -8.707174 | -6.328578 | 0.214074  |
| C | -8.031901 | -6.814755 | 1.334741  |
| C | -7.36151  | -5.925193 | 2.181933  |
| C | -7.368319 | -4.557027 | 1.909891  |
| C | 10.599845 | -1.512777 | 0.46728   |
| H | 11.790793 | -0.487936 | 2.691181  |
| H | 14.043846 | 0.530349  | 2.883707  |
| H | 15.51398  | 0.68588   | 0.883392  |
| H | 14.718043 | -0.182148 | -1.307209 |
| H | 12.463507 | -1.198159 | -1.493826 |
| H | 8.444384  | -2.912759 | 0.333716  |
| H | 6.034704  | -3.247957 | 0.027856  |
| H | 5.501992  | 0.976365  | -0.602891 |
| H | 7.927889  | 1.316134  | -0.295877 |
| H | 3.844602  | -2.486552 | -0.36556  |
| H | 3.370524  | 0.481437  | -0.918401 |
| H | -0.791144 | -1.453526 | -0.781259 |
| H | -2.178102 | 2.333375  | -2.367243 |
| H | 0.144406  | 3.015064  | -2.671895 |
| H | 2.009944  | 1.54327   | -2.002583 |
| H | -4.859399 | -0.128821 | -2.361314 |
| H | -3.650554 | 0.814383  | -3.211404 |
| H | -4.670216 | 1.813379  | 0.570041  |
| H | -6.612494 | 5.107256  | 0.048517  |
| H | -6.482648 | 3.852075  | 1.29169   |
| H | -4.166682 | 6.152682  | -0.623617 |
| H | -2.314329 | 7.40672   | 0.446868  |
| H | -1.86813  | 7.139244  | 2.88007   |
| H | -3.287009 | 5.608983  | 4.234428  |
| H | -5.136257 | 4.356874  | 3.161103  |
| H | -2.620624 | -1.476958 | 0.041068  |
| H | -3.192542 | -2.122558 | -1.498238 |

|   |           |           |           |
|---|-----------|-----------|-----------|
| H | -5.879886 | -2.961817 | -1.338596 |
| H | -8.540802 | -2.017049 | 1.308941  |
| H | -8.627201 | -2.369948 | -0.422841 |
| H | -9.234679 | -4.583019 | -0.935925 |
| H | -9.229133 | -7.012386 | -0.448842 |
| H | -8.026156 | -7.879438 | 1.5487    |
| H | -6.835528 | -6.297953 | 3.055943  |
| H | -6.846155 | -3.868928 | 2.569598  |
| H | 10.310062 | -2.010437 | 1.40169   |
| H | 10.566228 | -2.249148 | -0.345682 |
